# Supplementary material for: Biochemical Characterization of the Split Class II Ribonucleotide Reductase from Pseudomonas aeruginosa
Source: PLOS journal article supplement (doi:10.1371/journal.pone.0134293), 2015-07-30
Supplement: S3 (10.1371/journal.pone.0134293.s003) [file journal.pone.0134293.s003]

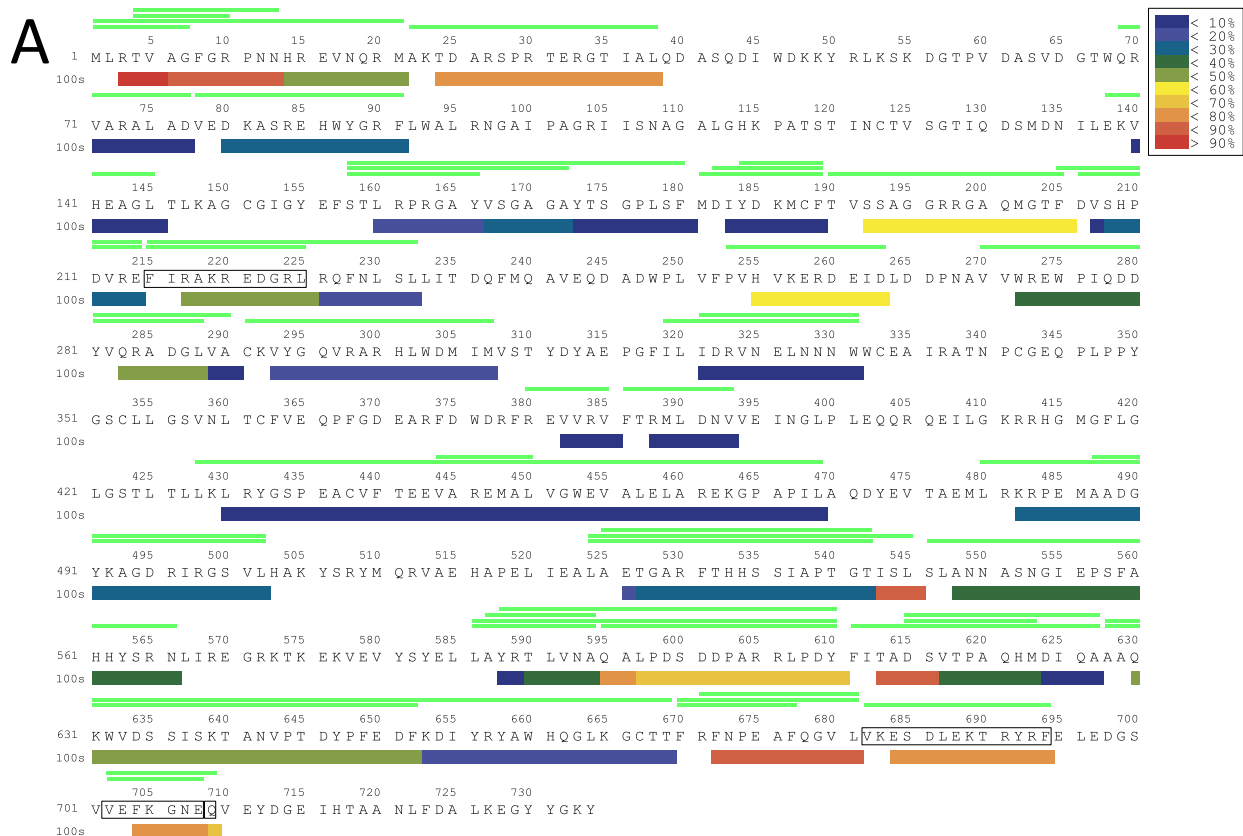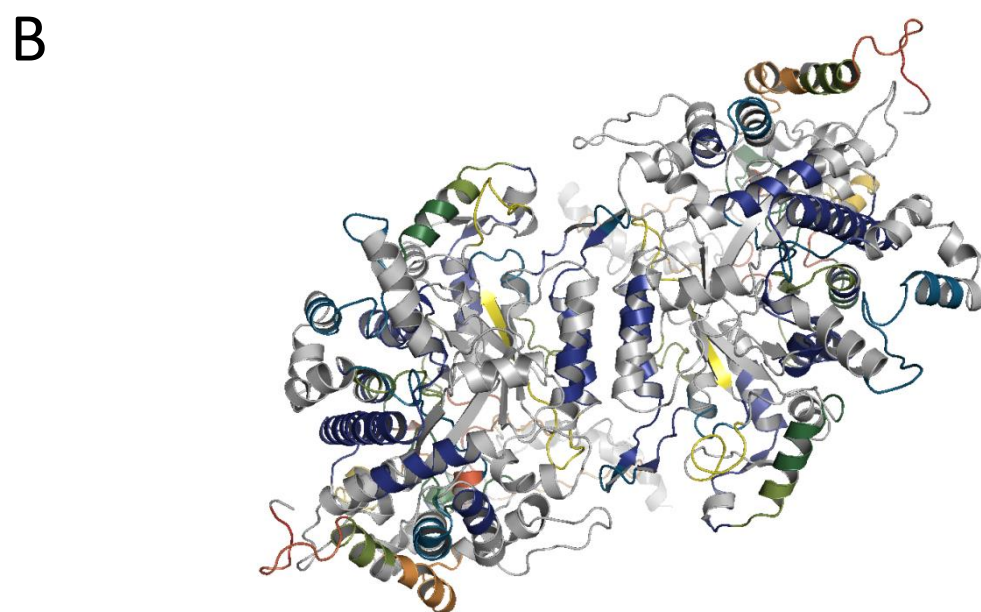

**S3 Fig. Single time-point deuteration profile of NrdJa by HDX MS analysis.** A) Identified peptides derived from pepsin digestion of NrdJa are depicted with horizontal green lines above the NrdJa protein sequence, and the corresponding color-coded deuteration level (see key inset) is given below the sequence. Peptides exhibiting decreased deuteration upon NrdJb binding are boxed (215-225, 682-694, 702-708 and 702-709). B) The deuteration level mapped onto a ribbon representation of the model of the NrdJa dimer. The HDX MS data was in general agreement with the predicted structure of the NrdJa dimer.
